# Supplementary material for: Integrative Identification and Validation of Exosome-Related Genes as Diagnostic Biomarkers and Potential Therapeutic Targets in Cholangiocarcinoma
Source: Research Square preprint supplement (doi:10.21203/rs.3.rs-8144185/v1), 2025-12-17
Supplement: Supplementary file 1 [file 967d129a60952ee4df5ef70b.xlsx]

## Sheet: Table S1 
id	logFC	AveExpr	t	P.Value	adj.P.Val	B
TACSTD1	3.00644	8.24863	16.6177	2.10644e-11	1.10646e-07	16.4098
CEACAM6	3.30774	8.25633	16.1065	3.35738e-11	1.10646e-07	15.9704
MSLN	3.59273	8.45666	15.8314	4.3387e-11	1.10646e-07	15.7275
RSPO3	2.62574	8.02749	15.5608	5.60498e-11	1.10646e-07	15.4842
CENTA1	2.11869	8.02707	15.3973	6.55557e-11	1.10646e-07	15.335
SNRPN	-1.12264	6.79163	-15.1898	8.01403e-11	1.10646e-07	15.1432
RAB25	2.97888	8.12306	15.0397	9.28197e-11	1.10646e-07	15.0026
VIM	-3.93344	8.3872	-15.0052	9.60267e-11	1.10646e-07	14.9701
PDPN	-1.63599	7.04168	-14.9072	1.05782e-10	1.10646e-07	14.8774
SPINT2	3.21485	8.92352	14.7683	1.21446e-10	1.10646e-07	14.7448
ANPEP	-1.37687	7.00421	-14.7433	1.24526e-10	1.10646e-07	14.7208
UCA1	3.42532	8.88821	14.6174	1.41286e-10	1.10646e-07	14.5994
GYPC	-2.53222	7.38887	-14.5881	1.45524e-10	1.10646e-07	14.5709
FOXQ1	3.30851	8.35827	14.5394	1.52865e-10	1.10646e-07	14.5236
AOX1	-2.96142	8.00888	-14.5183	1.56172e-10	1.10646e-07	14.5029
MAL2	2.86851	8.1893	14.48	1.62361e-10	1.10646e-07	14.4655
GREM1	-1.17178	6.77433	-14.4793	1.62475e-10	1.10646e-07	14.4648
KRT8	1.86748	9.78221	14.3987	1.7638e-10	1.12538e-07	14.3857
VCAN	-2.1524	7.46243	-14.3691	1.8178e-10	1.12538e-07	14.3566
SFN	3.0291	8.64897	14.2934	1.96456e-10	1.16336e-07	14.2816
MYH10	-1.96191	8.26835	-14.2245	2.10895e-10	1.19683e-07	14.2131
EPHA1	1.06769	6.97496	14.052	2.52201e-10	1.34129e-07	14.0401
LCN2	3.1753	9.0604	14.0375	2.56046e-10	1.34129e-07	14.0255
EFEMP1	-3.62475	8.18415	-13.9407	2.83333e-10	1.40066e-07	13.9274
GJA1	-2.06957	7.25392	-13.9096	2.9276e-10	1.40066e-07	13.8957
CDKN2B	-1.33332	6.85631	-13.892	2.98232e-10	1.40066e-07	13.8777
GLIPR2	-1.43098	7.23494	-13.7076	3.62515e-10	1.59273e-07	13.6882
EVPL	2.80169	8.0977	13.5844	4.13539e-10	1.73276e-07	13.5602
HOXB7	1.54161	7.41427	13.5452	4.31326e-10	1.73276e-07	13.5192
ZIC2	1.44617	7.07355	13.33	5.44584e-10	2.08061e-07	13.2921
CDS1	1.60641	7.50742	13.2999	5.62747e-10	2.08061e-07	13.2601
TMEM30B	2.06771	7.36924	13.2959	5.65217e-10	2.08061e-07	13.2558
PLLP	1.05614	7.19839	13.2301	6.07428e-10	2.17715e-07	13.1855
PNMA2	-1.81817	7.30701	-13.1617	6.54888e-10	2.26349e-07	13.112
SH2D3A	1.26437	7.32172	13.1229	6.83548e-10	2.27071e-07	13.0702
MTAP	-1.77836	7.08683	-13.0844	7.13336e-10	2.29535e-07	13.0285
EPCAM	3.11041	8.14003	13.0569	7.35404e-10	2.29535e-07	12.9987
RFTN1	-2.64751	7.66995	-12.9657	8.13994e-10	2.29535e-07	12.8993
GPC6	-1.04344	6.9322	-12.961	8.18216e-10	2.29535e-07	12.8943
SRGN	-3.93273	8.34735	-12.9418	8.35985e-10	2.29535e-07	12.8732
GRHL2	2.22242	7.82572	12.917	8.59492e-10	2.29535e-07	12.8461
GCNT1	-1.64526	7.3377	-12.7935	9.87508e-10	2.46128e-07	12.71
TLE2	-1.10692	6.91875	-12.7606	1.02499e-09	2.47986e-07	12.6735
MLLT11	-1.87191	7.61718	-12.7496	1.03783e-09	2.47986e-07	12.6613
TACSTD2	2.50857	10.0997	12.7022	1.09504e-09	2.51166e-07	12.6086
OVOL2	1.5245	7.218	12.6931	1.10646e-09	2.51166e-07	12.5985
GGT5	-1.02862	6.772	-12.5564	1.29326e-09	2.79591e-07	12.4452
RAB8B	-1.44827	7.70938	-12.5375	1.32159e-09	2.81251e-07	12.4239
RASSF7	1.16674	8.51785	12.4461	1.46833e-09	2.89129e-07	12.3204
ROR2	-1.07434	6.74694	-12.4115	1.5283e-09	2.89129e-07	12.281
RAB34	-1.84462	7.29887	-12.4106	1.52979e-09	2.89129e-07	12.2801
C18orf10	-1.38881	8.41499	-12.402	1.54513e-09	2.89129e-07	12.2703
C3orf14	-1.55836	6.96518	-12.3019	1.7357e-09	3.15203e-07	12.1557
GPR56	2.09185	7.5576	12.2013	1.95267e-09	3.27015e-07	12.0397
PTGES	2.30524	8.0601	12.1612	2.04679e-09	3.27968e-07	11.9932
ZBTB16	-1.07155	6.78009	-12.1016	2.19587e-09	3.43767e-07	11.9239
SLCO1B3	1.08559	6.88792	11.9817	2.53168e-09	3.82759e-07	11.7834
KLHDC8B	-1.46336	7.45565	-11.9559	2.61079e-09	3.82759e-07	11.753
AIF1L	1.58683	7.2467	11.9229	2.71573e-09	3.93492e-07	11.714
HKDC1	2.15177	7.79743	11.9106	2.75598e-09	3.94267e-07	11.6995
C4orf49	-1.98666	7.37992	-11.8708	2.89091e-09	4.00574e-07	11.6522
FLJ40504	1.48443	9.92394	11.8648	2.91166e-09	4.00574e-07	11.6452
JUP	1.09042	7.25529	11.8225	3.06361e-09	4.17264e-07	11.5948
GCNT3	2.92288	8.3171	11.7165	3.48254e-09	4.39459e-07	11.468
NID1	-1.12703	6.91014	-11.7024	3.54267e-09	4.39459e-07	11.451
CALD1	-1.6294	7.47697	-11.6391	3.82637e-09	4.49269e-07	11.3747
MUC1	1.65661	8.30619	11.5805	4.11059e-09	4.70473e-07	11.3037
MYEOV	2.52364	7.70764	11.5641	4.19403e-09	4.72088e-07	11.2838
GCA	1.01989	7.14387	11.5345	4.34929e-09	4.81605e-07	11.2478
ITGA1	-1.5154	7.55011	-11.4403	4.88493e-09	5.17576e-07	11.1325
KAT2B	-1.42506	7.66077	-11.4374	4.90215e-09	5.17576e-07	11.129
MST1R	1.13708	7.14303	11.4277	4.96178e-09	5.19842e-07	11.117
ABCA1	-2.00117	8.31599	-11.3556	5.42617e-09	5.59724e-07	11.0282
MFGE8	-2.32691	9.42079	-11.3336	5.57688e-09	5.62645e-07	11.001
AP1M2	1.34093	7.29443	11.2926	5.86904e-09	5.74666e-07	10.9503
MYL9	-1.73712	7.26387	-11.2875	5.90699e-09	5.74666e-07	10.9439
FXYD5	1.23546	8.38066	11.2744	6.00467e-09	5.80026e-07	10.9276
MT1E	-1.59745	7.57188	-11.2485	6.20223e-09	5.85954e-07	10.8954
ATOH8	-1.77558	7.31039	-11.2004	6.58831e-09	5.90347e-07	10.8354
SERPINB1	1.3419	8.7649	11.187	6.7005e-09	5.96476e-07	10.8186
ALOX5	1.53694	7.24604	11.1384	7.12419e-09	6.17926e-07	10.7576
PTPRG	-1.04471	7.26539	-11.1109	7.37669e-09	6.24041e-07	10.7229
M160	1.58852	7.31216	11.1019	7.46045e-09	6.2723e-07	10.7117
SYDE1	-1.14604	7.08585	-11.0861	7.61192e-09	6.36039e-07	10.6917
MT1M	-1.10228	6.72255	-11.0534	7.93451e-09	6.53419e-07	10.6504
TRIM47	1.40695	7.55304	10.9567	8.97634e-09	7.19163e-07	10.5275
PTGR1	-1.6137	8.41304	-10.902	9.62761e-09	7.44136e-07	10.4577
ANKRD10	1.01911	7.68339	10.8942	9.72513e-09	7.44136e-07	10.4476
PMP22	-1.4305	7.22629	-10.8844	9.84872e-09	7.45358e-07	10.4351
ST14	2.37258	7.74476	10.8842	9.85054e-09	7.45358e-07	10.4349
TWIST1	-1.71469	7.02514	-10.8662	1.00823e-08	7.5039e-07	10.4117
SPNS2	1.46484	7.16452	10.8593	1.0172e-08	7.52947e-07	10.4029
PSD4	1.25938	7.12295	10.8169	1.07447e-08	7.75039e-07	10.3482
AGR2	1.02501	7.52855	10.8161	1.0755e-08	7.75039e-07	10.3473
CAMK2N1	2.07553	9.23416	10.7839	1.12123e-08	7.87738e-07	10.3057
EDNRA	-1.43127	6.82543	-10.7703	1.14126e-08	7.97123e-07	10.2881
RAB17	1.46457	7.67841	10.7645	1.14984e-08	7.99021e-07	10.2806
FSTL1	-3.07044	7.99166	-10.7419	1.18406e-08	8.13543e-07	10.2513
FOXC1	1.57453	7.98439	10.7131	1.22925e-08	8.24745e-07	10.214
STOM	-2.22734	7.60715	-10.6974	1.2547e-08	8.37699e-07	10.1935
KCNK1	1.43443	7.19291	10.6774	1.28791e-08	8.49468e-07	10.1674
CCNA1	-1.02483	6.65463	-10.6542	1.32755e-08	8.65132e-07	10.1371
CTSF	-1.08853	6.97917	-10.6396	1.35311e-08	8.77586e-07	10.1181
PRICKLE2	-1.00433	6.99393	-10.5963	1.43221e-08	9.20127e-07	10.0613
FUT4	1.03542	7.14107	10.5916	1.44107e-08	9.21179e-07	10.0552
FAM84B	3.44238	8.67002	10.5883	1.44737e-08	9.21179e-07	10.0508
MMP7	1.25567	7.23462	10.5254	1.57231e-08	9.82332e-07	9.96808
PTGER2	-2.20315	7.29664	-10.5074	1.61024e-08	9.95704e-07	9.94425
LFNG	1.00322	6.95848	10.4659	1.70103e-08	1.02513e-06	9.88941
LAMB3	2.5662	8.26638	10.3825	1.90065e-08	1.11581e-06	9.77841
IRAK3	-1.08915	6.88059	-10.3332	2.03013e-08	1.17468e-06	9.71245
TMC6	1.33471	7.35212	10.3313	2.03543e-08	1.17468e-06	9.70985
MAP2	-1.63098	7.53701	-10.3209	2.06392e-08	1.1861e-06	9.69593
F3	1.47695	9.07863	10.3158	2.07803e-08	1.18821e-06	9.68911
CCNO	1.38778	7.33242	10.2824	2.17321e-08	1.21308e-06	9.64428
CDH13	-1.15135	6.79489	-10.2769	2.1895e-08	1.21718e-06	9.6368
S100P	4.27766	9.13921	10.2492	2.27245e-08	1.25307e-06	9.59956
EFHD2	1.99446	9.5287	10.2339	2.31983e-08	1.25937e-06	9.57889
CDH1	2.54069	8.21891	10.2336	2.32087e-08	1.25937e-06	9.57844
PALLD	-1.67756	8.62525	-10.2262	2.34429e-08	1.26703e-06	9.56838
SERP2	-1.2104	6.7151	-10.18	2.4951e-08	1.31718e-06	9.50592
FOXA1	2.20141	7.9817	10.1744	2.51428e-08	1.32218e-06	9.49824
FGG	-2.66336	7.69518	-10.1036	2.76811e-08	1.41735e-06	9.40185
TGFA	2.19781	8.00573	10.065	2.91757e-08	1.45788e-06	9.34912
METTL7A	-1.04826	7.29416	-10.0639	2.92219e-08	1.45788e-06	9.34753
PROS1	-2.26579	8.44406	-10.0497	2.97934e-08	1.47278e-06	9.32811
TNFAIP8L3	-1.02812	6.79818	-10.0303	3.05925e-08	1.49881e-06	9.30156
STARD10	1.19508	7.22363	10.0111	3.14111e-08	1.5135e-06	9.27507
ITGA5	-1.791	8.46602	-9.97719	3.29066e-08	1.56163e-06	9.2284
CNTNAP1	-1.33291	7.09919	-9.96668	3.33853e-08	1.57338e-06	9.21391
PLOD2	-1.92308	8.97834	-9.91177	3.60108e-08	1.67539e-06	9.13793
S1PR3	-2.04548	7.44165	-9.89516	3.68473e-08	1.68702e-06	9.11488
TNFRSF21	1.3566	9.99235	9.87512	3.78833e-08	1.69852e-06	9.08704
PDGFC	-1.0273	7.11275	-9.83737	3.99202e-08	1.77105e-06	9.03445
C1orf116	1.35719	7.80558	9.75205	4.49603e-08	1.92277e-06	8.915
TRAM2	-1.03152	8.17966	-9.73526	4.60285e-08	1.9384e-06	8.89141
VIL2	1.76078	11.2001	9.67787	4.98879e-08	2.0466e-06	8.81048
SOX9	1.36745	7.29322	9.65813	5.12923e-08	2.08386e-06	8.78256
SLC16A5	2.04525	8.23451	9.64817	5.20173e-08	2.1023e-06	8.76845
C5orf23	-1.02918	6.80479	-9.6456	5.22058e-08	2.10368e-06	8.76481
HOXB5	1.23685	7.4339	9.63489	5.29999e-08	2.11689e-06	8.74963
COL8A1	-1.69898	7.82709	-9.60742	5.50964e-08	2.17511e-06	8.71062
DKK3	-1.37801	7.13624	-9.59789	5.58439e-08	2.19191e-06	8.69706
SVEP1	-2.58433	7.69053	-9.58577	5.68099e-08	2.22342e-06	8.67981
TNFRSF11B	-1.73639	7.26668	-9.55696	5.91772e-08	2.29628e-06	8.63874
FMO3	-1.0526	6.76359	-9.52637	6.18054e-08	2.39145e-06	8.59502
PDGFRB	-2.06179	7.35641	-9.46454	6.74995e-08	2.58243e-06	8.50632
SPINT1	1.06097	7.14912	9.37236	7.70369e-08	2.90649e-06	8.37324
RHOF	1.25092	7.50418	9.33537	8.12542e-08	3.04034e-06	8.31955
KCNS3	1.14312	7.24106	9.32707	8.22338e-08	3.06018e-06	8.30748
KRTCAP3	1.67706	7.4149	9.29693	8.58955e-08	3.16188e-06	8.26359
EVL	-1.93996	7.47985	-9.29279	8.64117e-08	3.16378e-06	8.25755
CXCL16	1.12302	7.55869	9.28397	8.75229e-08	3.19588e-06	8.24467
LAD1	1.67693	7.40017	9.26059	9.05404e-08	3.29722e-06	8.21051
SLC2A10	-1.39978	7.05509	-9.24341	9.28277e-08	3.35892e-06	8.18537
MPDZ	-1.26081	6.98362	-9.24233	9.29744e-08	3.35892e-06	8.18378
TMEM45A	-1.04171	6.93144	-9.19915	9.90051e-08	3.50287e-06	8.12042
CGN	1.82297	7.98061	9.19491	9.96199e-08	3.5121e-06	8.11418
MAPK13	2.67604	8.28744	9.1499	1.0639e-07	3.70596e-06	8.04788
CCDC53	-1.04241	8.71624	-9.13457	1.08806e-07	3.77084e-06	8.02524
NRSN2	-1.40117	7.19941	-9.10707	1.13285e-07	3.89633e-06	7.98455
TCN1	1.04005	6.90203	9.06009	1.21392e-07	4.11493e-06	7.91482
F2R	-1.01243	8.70256	-9.05637	1.22058e-07	4.11493e-06	7.9093
GPRC5A	1.28457	8.8682	9.01659	1.29442e-07	4.28461e-06	7.85003
PLEKHG3	1.21725	7.47336	8.99093	1.34453e-07	4.41266e-06	7.8117
CBS	-2.03345	8.57692	-8.98239	1.36166e-07	4.45814e-06	7.79892
FAM83A	1.2074	6.93197	8.95215	1.42416e-07	4.64044e-06	7.75362
DNAJA4	1.28924	7.55919	8.94277	1.44417e-07	4.68323e-06	7.73953
RAB38	1.07251	7.06518	8.88963	1.56317e-07	4.9744e-06	7.65958
SLC7A5	1.80376	9.91929	8.87995	1.58596e-07	5.00096e-06	7.64497
S100A16	1.18701	8.95123	8.87984	1.58621e-07	5.00096e-06	7.64481
RPS23	1.2136	8.24857	8.8655	1.6206e-07	5.08584e-06	7.62315
SPARC	-2.77096	7.82518	-8.86329	1.62595e-07	5.09091e-06	7.61981
PCMT1	-1.00348	9.50674	-8.82261	1.72817e-07	5.32526e-06	7.55823
KRT19	2.57267	9.49911	8.68247	2.13525e-07	6.22743e-06	7.34448
ALS2CR4	-1.18116	8.62914	-8.65957	2.21079e-07	6.42025e-06	7.30933
MAP7	1.22154	7.18658	8.62539	2.32889e-07	6.6498e-06	7.25671
ANTXR1	-1.42556	7.2184	-8.52974	2.6959e-07	7.46304e-06	7.10871
ANXA5	-1.11286	10.7035	-8.52591	2.71182e-07	7.49189e-06	7.10275
SORT1	-1.68152	8.02415	-8.50043	2.82018e-07	7.72855e-06	7.06311
ASAP3	-1.21713	7.88685	-8.48837	2.87305e-07	7.83395e-06	7.04432
BNIP3	-2.47786	7.78076	-8.43933	3.09898e-07	8.2537e-06	6.96773
ITGA2	1.6999	7.85989	8.43434	3.12301e-07	8.28927e-06	6.95991
ARID5B	-1.57644	7.84082	-8.43325	3.12826e-07	8.28927e-06	6.95821
LEPREL1	-1.36047	7.08524	-8.40848	3.25061e-07	8.49701e-06	6.91938
RGS4	-1.8377	7.38339	-8.3782	3.40705e-07	8.75547e-06	6.8718
PLEKHF1	1.08133	7.31005	8.33318	3.65441e-07	9.21809e-06	6.80085
WDR72	2.09317	7.46161	8.25972	4.09937e-07	1.01515e-05	6.6845
FGFBP1	2.79933	8.10059	8.24714	4.18112e-07	1.02422e-05	6.6645
LAMA5	1.33871	9.80813	8.2387	4.23694e-07	1.03233e-05	6.65107
SLC29A2	1.16674	7.27656	8.21349	4.40827e-07	1.06455e-05	6.61092
TFF1	1.40856	7.123	8.17549	4.68053e-07	1.11644e-05	6.55021
RBM47	1.20814	7.28029	8.13989	4.95151e-07	1.1688e-05	6.49318
ARL14	1.19744	6.83116	8.13274	5.0079e-07	1.17667e-05	6.48171
C19orf33	1.60996	9.15392	8.09631	5.30589e-07	1.22485e-05	6.42314
SLC2A1	1.05749	8.68766	8.0752	5.4871e-07	1.26027e-05	6.38911
GOLT1A	1.02838	7.21727	8.07013	5.53153e-07	1.26621e-05	6.38093
SUSD2	-1.9529	8.77544	-7.99398	6.24689e-07	1.39024e-05	6.25765
HSPB1	-1.50779	8.78225	-7.9889	6.29795e-07	1.39704e-05	6.2494
RAB31	-1.76799	8.1597	-7.8882	7.40555e-07	1.60157e-05	6.08513
RGL1	-1.24036	7.38914	-7.77748	8.86272e-07	1.83682e-05	5.90294
FAM83H	1.30453	8.04915	7.77114	8.95482e-07	1.83682e-05	5.89245
CLDN1	1.59473	9.69894	7.76262	9.08001e-07	1.85736e-05	5.87836
NET1	1.60022	8.01818	7.72874	9.59674e-07	1.93641e-05	5.82221
MMD	-1.39539	8.32231	-7.68229	1.03558e-06	2.06579e-05	5.74497
THY1	-1.24869	6.90339	-7.66456	1.06618e-06	2.11123e-05	5.71541
FUT3	1.91963	7.50966	7.66035	1.0736e-06	2.11919e-05	5.70837
HBEGF	1.7929	7.93183	7.6594	1.07528e-06	2.11944e-05	5.70679
JPH1	1.04042	6.99739	7.60931	1.1678e-06	2.25929e-05	5.62302
PPP1R14A	-1.44893	7.14814	-7.55728	1.27279e-06	2.42454e-05	5.53562
AKR1B1	-3.00419	8.78788	-7.52681	1.33883e-06	2.50823e-05	5.48428
RAB32	-2.88027	8.20442	-7.50558	1.38694e-06	2.5771e-05	5.44843
COL5A2	-2.42651	7.71006	-7.4471	1.52912e-06	2.77318e-05	5.34935
RHPN2	1.94941	8.50013	7.44029	1.54665e-06	2.79381e-05	5.33777
FA2H	1.33339	7.03887	7.37797	1.71707e-06	3.03721e-05	5.23162
RECK	-1.13416	6.97945	-7.36703	1.74899e-06	3.07258e-05	5.21291
ITGB4	1.46067	7.39306	7.3266	1.87235e-06	3.26105e-05	5.1437
NNMT	-1.92862	8.31943	-7.30132	1.95407e-06	3.36042e-05	5.1003
MSX1	1.56079	7.45801	7.25371	2.1183e-06	3.53569e-05	5.01833
CYP2J2	1.02819	6.85436	7.24938	2.13395e-06	3.55311e-05	5.01085
GULP1	1.5881	7.82935	7.18164	2.39495e-06	3.88006e-05	4.89363
FER1L3	1.06144	9.11171	7.16785	2.45202e-06	3.95225e-05	4.86971
HTRA1	-2.48038	9.09003	-7.14169	2.56434e-06	4.08973e-05	4.82421
HS3ST1	1.8204	7.39199	7.13006	2.61595e-06	4.13332e-05	4.80396
PAPSS2	-2.17673	8.12498	-7.12245	2.6503e-06	4.17307e-05	4.7907
SERPINE1	-2.49368	8.38243	-7.11582	2.68065e-06	4.21113e-05	4.77913
NEXN	-1.14938	7.03366	-7.0174	3.17616e-06	4.80722e-05	4.60679
IFITM2	-1.86315	10.0291	-6.97353	3.42704e-06	5.08243e-05	4.52953
INMT	-1.53676	7.11896	-6.97028	3.44645e-06	5.0967e-05	4.52379
CPA4	-1.60924	8.33391	-6.96566	3.47421e-06	5.11319e-05	4.51564
ELFN2	1.10149	7.15266	6.95542	3.53655e-06	5.18491e-05	4.49756
SCPEP1	-1.49259	8.00174	-6.93515	3.66353e-06	5.32521e-05	4.46172
CYR61	-1.11905	10.2692	-6.92957	3.69925e-06	5.35724e-05	4.45185
CHES1	-1.34573	8.53232	-6.9244	3.73277e-06	5.39134e-05	4.44268
GDPD3	1.22149	7.00608	6.79252	4.70274e-06	6.45028e-05	4.20792
GJB2	2.2933	7.5932	6.78368	4.77654e-06	6.51215e-05	4.19209
ABI3BP	-1.1365	6.94926	-6.74562	5.10831e-06	6.89546e-05	4.12383
PHLDA1	1.0406	8.12105	6.67918	5.7463e-06	7.49209e-05	4.00421
KRT15	1.08078	7.10424	6.66602	5.88227e-06	7.6325e-05	3.98044
KRT80	1.92102	8.48732	6.63468	6.21973e-06	7.97671e-05	3.92374
PGRMC2	-1.13666	8.48738	-6.62264	6.35479e-06	8.09656e-05	3.9019
TMTC1	-1.0476	6.92606	-6.6152	6.43971e-06	8.1818e-05	3.88841
C20orf100	-1.29385	7.90259	-6.58025	6.85471e-06	8.63655e-05	3.82493
EZR	1.72512	10.8176	6.56498	7.0447e-06	8.81073e-05	3.79714
PODXL	1.43219	7.26499	6.52863	7.51947e-06	9.31894e-05	3.73085
RPS6KA2	-1.84016	7.757	-6.52765	7.53279e-06	9.32697e-05	3.72905
STC1	-1.19627	7.34933	-6.5009	7.90401e-06	9.69844e-05	3.68016
PPP1R14C	1.24704	7.01531	6.47922	8.21898e-06	9.92398e-05	3.64044
KLF9	-1.43804	8.10556	-6.39182	9.62721e-06	0.000112648	3.4797
ALPK2	-1.3051	7.02824	-6.38735	9.70562e-06	0.000113468	3.47145
EHF	1.1428	7.22653	6.35972	1.02056e-05	0.000118442	3.4204
TRIP6	-1.83945	7.6655	-6.34056	1.05681e-05	0.000121466	3.38493
MUC20	1.3669	7.00772	6.30205	1.13375e-05	0.000128788	3.3135
ITPR1	-1.02772	7.17368	-6.28511	1.16944e-05	0.000132181	3.282
SLC44A3	1.4717	7.99759	6.25807	1.22882e-05	0.000137636	3.23167
NCRNA00219	1.21363	9.13848	6.25626	1.23291e-05	0.000137902	3.2283
FERMT1	1.09015	7.11065	6.24757	1.25272e-05	0.000139624	3.21209
RAP1GAP	1.5961	7.42568	6.20108	1.3645e-05	0.000150117	3.12524
TIGA1	1.09758	9.02925	6.19523	1.37928e-05	0.000151498	3.1143
ALPL	-1.48016	7.18619	-6.19474	1.38053e-05	0.000151513	3.11337
CST6	1.91955	7.31594	6.19363	1.38336e-05	0.00015158	3.11129
HMGA1	1.08076	7.20015	6.12113	1.58164e-05	0.000169626	2.97519
JAM3	-1.20076	7.02057	-6.08749	1.68349e-05	0.000178575	2.91179
ABCA8	-1.07686	6.89939	-6.06926	1.74151e-05	0.000183586	2.87736
MARCKS	-1.29556	9.44881	-6.04777	1.81255e-05	0.000189172	2.83674
PRKD1	-1.17471	6.99905	-6.03946	1.84083e-05	0.000191099	2.82101
GNA15	1.36861	6.97152	5.98135	2.05189e-05	0.000206554	2.71076
KIAA0367	-1.38201	7.10399	-5.97794	2.06502e-05	0.000207436	2.70427
C1orf106	1.44768	7.7635	5.91579	2.3204e-05	0.000226876	2.58585
C5orf13	-1.15012	7.36915	-5.9131	2.3322e-05	0.000227866	2.5807
CDH3	1.88156	7.36739	5.90747	2.35703e-05	0.000229469	2.56995
MAP1B	-1.12797	7.00987	-5.89749	2.4017e-05	0.000233151	2.55088
NUPR1	-1.21894	7.41839	-5.88442	2.46157e-05	0.000237609	2.52587
TMC4	1.42686	7.4721	5.87931	2.48539e-05	0.000239569	2.51609
PSCA	2.32173	7.83345	5.84438	2.65479e-05	0.000251448	2.44914
EMP3	-1.46751	8.25562	-5.8101	2.83273e-05	0.000264259	2.38327
LAMA3	1.66339	7.50794	5.80824	2.84277e-05	0.000264773	2.37968
FNBP1	-2.37668	8.28066	-5.79109	2.93671e-05	0.00027191	2.34668
EFEMP2	-1.41699	7.27897	-5.77963	3.00127e-05	0.000276196	2.3246
MALL	1.71039	7.16126	5.77893	3.0053e-05	0.000276196	2.32324
LGR4	1.13766	7.94566	5.75527	3.14347e-05	0.000286191	2.27761
KRT81	2.0421	11.0402	5.72382	3.33749e-05	0.000301237	2.21682
AGPAT9	1.23077	7.05413	5.7178	3.37602e-05	0.000303307	2.20517
CYB5A	-1.32519	9.12898	-5.67064	3.69425e-05	0.000326513	2.11375
ANGPT1	-1.07339	7.00111	-5.66479	3.73585e-05	0.000329122	2.10238
CPE	-1.31863	7.57702	-5.65619	3.79789e-05	0.000333039	2.08567
CYP1B1	-1.90398	7.98648	-5.60516	4.18852e-05	0.000360518	1.98634
TRIB1	1.42016	9.2266	5.60098	4.22228e-05	0.000361544	1.9782
SNX2	-1.42263	7.31671	-5.5935	4.28351e-05	0.00036509	1.96359
MAP1LC3A	-1.55993	7.33273	-5.56906	4.48985e-05	0.000377947	1.91587
TMEM51	1.077	8.2176	5.50826	5.04902e-05	0.000416521	1.79682
NFIB	-1.16655	9.32764	-5.47713	5.36276e-05	0.000436325	1.7357
TPM2	-1.70901	8.81226	-5.47572	5.37745e-05	0.000436477	1.73292
C9orf169	1.2585	7.21719	5.47167	5.4198e-05	0.000439391	1.72497
LAMA4	-1.32901	7.6321	-5.45699	5.57647e-05	0.000449683	1.69608
LOX	-1.56333	8.03055	-5.42441	5.94092e-05	0.000473466	1.6319
IER3	1.05482	9.72231	5.40807	6.13284e-05	0.000485636	1.59967
SPOCK1	-1.6202	7.39515	-5.3926	6.32052e-05	0.000496456	1.56912
PDE1A	-1.03714	6.91899	-5.32855	7.16291e-05	0.000550248	1.44235
TIMP4	-1.9534	7.91306	-5.31979	7.28694e-05	0.000558201	1.42495
ICAM2	1.0468	6.79224	5.31207	7.39787e-05	0.000565426	1.40965
COL1A1	-2.18606	7.84037	-5.31053	7.42024e-05	0.000566183	1.40659
DCN	-1.49661	7.2111	-5.28103	7.86233e-05	0.000593926	1.34797
SERPINB5	2.75413	7.87156	5.2304	8.68548e-05	0.000641868	1.24714
EPSTI1	-1.13283	8.01475	-5.21552	8.94384e-05	0.000655978	1.21746
RBM35A	1.4718	7.38837	5.21464	8.9595e-05	0.000656773	1.21569
SLC20A2	1.2126	7.96789	5.20236	9.17907e-05	0.000671783	1.19118
IFI44L	-1.46898	7.77964	-5.19115	9.38448e-05	0.00068383	1.16878
PDK4	-1.61382	7.76623	-5.16351	9.91126e-05	0.00071424	1.1135
KLK6	2.14169	7.40083	5.14386	0.000103043	0.000738268	1.07414
GPR110	1.08234	6.85216	5.138	0.000104245	0.000746097	1.0624
CRISPLD2	-1.8731	8.11219	-5.12576	0.000106805	0.000759232	1.03786
ACTA2	-2.49654	8.36669	-5.10739	0.000110769	0.000782916	1.00099
EPHA2	1.32931	7.74025	5.08921	0.000114841	0.000807922	0.964468
LAMC2	1.3602	7.49083	5.04468	0.000125479	0.000869733	0.874874
RBP1	-1.29286	7.23288	-5.02793	0.000129739	0.00089561	0.841121
SLC45A3	1.16366	7.28379	4.98152	0.000142334	0.000966501	0.74746
PHACTR3	1.88417	7.46314	4.97686	0.000143667	0.000974472	0.73804
CITED2	-1.1775	8.87498	-4.97513	0.000144164	0.000976874	0.734547
C5orf46	-1.10545	7.10472	-4.96896	0.000145954	0.000986059	0.722076
DPYSL2	-1.44436	9.82562	-4.95442	0.000150267	0.00100704	0.692651
FAM89A	1.05837	7.27035	4.93702	0.000155594	0.00103628	0.657448
NFIX	-1.17371	7.67155	-4.90492	0.000165944	0.00109345	0.592396
IGFBP7	-2.43359	8.446	-4.89352	0.00016979	0.00111555	0.569259
S100A4	2.47641	8.55782	4.88391	0.000173101	0.00113402	0.549754
INA	-1.00376	6.644	-4.87954	0.000174627	0.00114073	0.540889
MYLIP	1.04217	7.79297	4.86842	0.000178576	0.00116151	0.518307
ELF3	1.7863	8.29462	4.85736	0.000182598	0.00118315	0.495819
CADM3	-1.04559	6.90526	-4.84433	0.000187454	0.00120973	0.469325
FADS1	-1.76268	8.58691	-4.8442	0.000187503	0.00120973	0.46906
F2RL1	1.01513	7.7001	4.81456	0.000199051	0.00127042	0.40874
EFHD1	-1.70743	7.36769	-4.78075	0.000213115	0.00134755	0.339852
LMTK3	1.19677	7.11778	4.75571	0.00022419	0.00140389	0.288746
COL1A2	-2.34466	7.88003	-4.70874	0.000246578	0.00151933	0.192766
HPGD	1.19428	6.98581	4.70658	0.000247662	0.00152287	0.188346
LGALS1	-1.30818	10.4522	-4.70528	0.000248316	0.0015262	0.185685
C1QTNF1	-1.30005	7.32889	-4.69316	0.000254501	0.00155649	0.160887
PLEK2	1.07455	7.39614	4.6592	0.000272687	0.00164336	0.091332
GBE1	-1.15308	8.74149	-4.65763	0.00027356	0.00164716	0.088111
CDA	1.32065	9.49811	4.64699	0.000279545	0.00167579	0.0663063
FOSL1	1.43251	7.58705	4.64449	0.00028097	0.00168137	0.0611835
PPP1R3C	-1.61626	7.40913	-4.63027	0.000289228	0.00171469	0.0320038
COL4A1	-2.36912	8.12255	-4.62709	0.000291104	0.00172234	0.0254908
CNR1	-1.06246	6.92602	-4.60408	0.000305083	0.00178874	-0.0217465
PROM2	1.43742	7.09298	4.60134	0.000306794	0.00179645	-0.0273778
TEAD2	-1.16324	7.21353	-4.58716	0.000315799	0.00183733	-0.0565047
OCIAD2	1.17091	8.40885	4.57998	0.000320461	0.00185731	-0.0712561
IL7R	-1.3915	7.49115	-4.54624	0.000343334	0.00196479	-0.140645
COL5A1	-1.78392	7.49785	-4.53431	0.000351816	0.00200536	-0.165201
PDGFRA	-1.58453	7.29354	-4.51417	0.000366624	0.0020754	-0.206678
WDR54	-1.34228	8.68866	-4.5091	0.000370454	0.00209187	-0.217132
MIR614	1.11559	7.54238	4.48575	0.000388612	0.00217808	-0.265254
TNFAIP2	1.07468	7.63171	4.46683	0.000403989	0.00224677	-0.304271
CDH2	-1.34078	7.18333	-4.46534	0.000405223	0.00225179	-0.307335
HES1	1.20715	7.88754	4.45908	0.000410471	0.00227816	-0.32027
ITPR3	1.13125	8.18289	4.45596	0.000413101	0.00228996	-0.326691
ID3	-1.36552	7.82354	-4.44348	0.000423833	0.00233709	-0.352467
NPR3	-1.10463	7.0883	-4.39241	0.000470759	0.00252829	-0.457959
TMEM16A	1.27186	6.88383	4.37551	0.000487431	0.0026055	-0.492906
PAPLN	-1.22063	7.47905	-4.3716	0.00049138	0.00262146	-0.501008
PRCP	-1.25616	8.68951	-4.35575	0.00050769	0.00268603	-0.533786
GAS1	-1.25514	7.19894	-4.35522	0.000508249	0.00268725	-0.534891
KRT13	3.28877	8.08638	4.35451	0.00050899	0.00269012	-0.536353
DUSP23	-1.76473	9.0193	-4.35148	0.000512187	0.00270387	-0.542638
KLK5	1.12343	6.81689	4.31126	0.000556504	0.0028985	-0.625905
DHRS9	1.03232	7.01637	4.31034	0.000557561	0.0029029	-0.627809
HSPB6	-1.64397	7.53409	-4.29758	0.000572462	0.00295899	-0.654262
IFI27	1.0574	8.1619	4.29588	0.000574477	0.00296603	-0.657787
FILIP1L	-1.16855	7.42958	-4.29178	0.00057936	0.00298784	-0.666274
HLA-A29.1	1.60625	7.59947	4.2871	0.000584989	0.00301231	-0.675971
TINAGL1	1.26952	7.63803	4.28397	0.000588794	0.00302747	-0.682471
DFNA5	-1.18736	7.43521	-4.27451	0.000600423	0.00307631	-0.70208
FGA	-1.59396	7.41495	-4.27312	0.000602148	0.00307981	-0.704957
ALPP	1.30847	7.78907	4.23847	0.000646905	0.00327176	-0.776816
LCP1	1.92402	7.36307	4.23544	0.000650986	0.00328995	-0.783117
SIRPA	-1.0706	7.08255	-4.23297	0.000654316	0.00330244	-0.78823
OSAP	-1.17288	7.14259	-4.23177	0.000655955	0.0033077	-0.790735
FGB	-1.46009	7.31152	-4.22865	0.000660207	0.00332054	-0.797209
FKBP5	-1.52505	9.17914	-4.22777	0.000661406	0.00332534	-0.799027
KRT17	2.07614	7.66339	4.21393	0.000680645	0.00339849	-0.82775
ANO1	1.44346	7.05566	4.2139	0.000680695	0.00339849	-0.827823
FLJ22662	1.94679	7.37733	4.19614	0.000706217	0.00350111	-0.864685
SNCG	1.51183	7.27681	4.15089	0.000775751	0.00378022	-0.958683
C6orf15	1.70948	7.2395	4.13889	0.000795318	0.00385351	-0.983605
MUC16	1.33518	7.03153	4.11752	0.000831432	0.00399017	-1.02802
NRCAM	-1.02811	7.08177	-4.09143	0.000877792	0.00417879	-1.08227
CCND1	1.14423	10.0017	4.08495	0.000889707	0.00422813	-1.09574
TNS3	-1.24318	9.81547	-4.07325	0.000911628	0.00431274	-1.12007
GNG11	-1.41084	7.41685	-4.06609	0.000925328	0.00435637	-1.13497
MYO6	1.20391	8.05387	4.05784	0.000941358	0.00441961	-1.15213
ARHGDIB	1.71305	9.39446	4.05311	0.000950677	0.00445875	-1.16197
ADAMTS1	-1.12889	7.1086	-4.03568	0.000985831	0.00457168	-1.19823
LYN	1.05372	8.9252	3.98908	0.00108641	0.00494712	-1.29519
KRT6C	1.28044	6.92128	3.9827	0.00110097	0.00500175	-1.30848
MFAP4	-1.2936	7.19514	-3.97157	0.00112683	0.00509034	-1.33163
SCEL	1.16877	7.01918	3.96398	0.00114482	0.00513415	-1.34743
THBS1	-1.07339	9.75845	-3.95484	0.00116688	0.00519884	-1.36646
PAPPA	-1.47253	7.47548	-3.94039	0.00120262	0.00532845	-1.39653
PHGDH	-1.41761	10.7162	-3.93298	0.00122139	0.00538857	-1.41197
FBP1	1.42504	7.20981	3.91233	0.00127521	0.00557752	-1.45494
RHOQ	-1.29755	8.83616	-3.90721	0.00128894	0.00562313	-1.4656
DARC	-1.104	7.01923	-3.90639	0.00129114	0.00562612	-1.4673
C10orf116	3.01077	8.41916	3.85751	0.00143008	0.00609441	-1.56905
SERPINA3	-1.13234	7.28082	-3.80149	0.00160794	0.00668456	-1.68561
CPVL	1.22324	6.96972	3.79727	0.00162221	0.00673398	-1.69438
VIPR1	1.40977	7.62292	3.78988	0.00164753	0.00682048	-1.70978
CLIP3	-1.29498	7.40982	-3.76362	0.00174065	0.00713225	-1.76438
EMP1	1.6214	9.02332	3.76236	0.00174526	0.00714397	-1.76701
HBE1	1.79114	7.25166	3.749	0.00179478	0.00730573	-1.79479
KRT20	1.18148	6.91278	3.7457	0.00180724	0.00734854	-1.80165
HRASLS3	1.36909	8.54398	3.64897	0.00221346	0.00870554	-2.00265
PFN2	-1.14144	7.72794	-3.64657	0.00222463	0.00874192	-2.00763
IGFBP5	-1.95159	7.71131	-3.63604	0.0022743	0.00891395	-2.02949
TFPI	-1.08638	8.13085	-3.61575	0.00237315	0.0092455	-2.07159
COL6A3	-1.53217	7.41277	-3.58587	0.00252667	0.00972952	-2.13358
PRSS3	1.92463	7.61826	3.56378	0.00264645	0.010105	-2.17935
THBS2	-1.62433	7.46781	-3.55753	0.0026814	0.0102184	-2.19231
COL3A1	-2.00887	7.7254	-3.54912	0.00272912	0.0103684	-2.20973
CXCL12	-1.56424	7.40689	-3.53384	0.00281798	0.0106377	-2.24136
WNT5A	-1.0393	7.12735	-3.50653	0.00298411	0.011172	-2.29788
PLAU	2.01075	8.08543	3.50498	0.00299382	0.0111967	-2.30108
DAB2	-1.21523	8.07203	-3.49063	0.00308531	0.0114631	-2.33077
VARS2	1.5653	9.14022	3.48467	0.00312411	0.0115752	-2.34309
CTGF	-1.46688	8.01579	-3.48356	0.00313139	0.0115947	-2.34538
SERINC2	1.11321	8.04922	3.44269	0.00341156	0.0124202	-2.42979
IGFBP4	-1.42442	10.5667	-3.32203	0.00439292	0.015267	-2.67821
SEMA3A	1.48774	7.38597	3.27475	0.00484978	0.0164807	-2.77516
ARHGEF10	-1.07661	7.35455	-3.27255	0.00487214	0.0165498	-2.77966
SCRN1	-1.03104	8.61428	-3.20063	0.00566234	0.0186283	-2.92661
SERPINB2	1.48545	7.41688	3.19304	0.00575277	0.0188575	-2.94208
EFNB2	1.80365	8.45172	3.18207	0.00588607	0.0192296	-2.96444
MT2A	-1.29787	10.8186	-3.1384	0.00644743	0.0207647	-3.05325
KRT6A	1.92329	7.94699	3.12894	0.00657585	0.0210588	-3.07245
CFD	1.12231	7.73494	3.12128	0.00668162	0.0213574	-3.08799
GSTO2	1.0913	8.30539	3.1128	0.00680064	0.0216615	-3.10517
ALDH1A3	1.04926	8.93127	3.06677	0.00748433	0.0233853	-3.1983
LDHB	-1.72344	8.02552	-3.0385	0.00793728	0.0245132	-3.25534
ERAP2	1.1829	8.03316	2.99153	0.00874983	0.0265033	-3.34979
ECH1	-1.01243	7.77137	-2.89947	0.0105853	0.030958	-3.53375
BASP1	-2.24302	8.80759	-2.83592	0.0120658	0.0344738	-3.65974
GDA	1.0452	7.05851	2.80226	0.0129296	0.0364825	-3.72611
CCL2	-1.56262	7.63068	-2.78095	0.0135072	0.0378223	-3.768
PTPRK	-1.02665	7.40981	-2.73323	0.0148923	0.0409825	-3.8614

## Sheet: Table S2 
id	logFC	AveExpr	t	P.Value	adj.P.Val	B
VIM	-3.93344	8.3872	-15.0052	9.60267e-11	1.10646e-07	14.9701
ANPEP	-1.37687	7.00421	-14.7433	1.24526e-10	1.10646e-07	14.7208
SFN	3.0291	8.64897	14.2934	1.96456e-10	1.16336e-07	14.2816
LCN2	3.1753	9.0604	14.0375	2.56046e-10	1.34129e-07	14.0255
GLIPR2	-1.43098	7.23494	-13.7076	3.62515e-10	1.59273e-07	13.6882
EPCAM	3.11041	8.14003	13.0569	7.35404e-10	2.29535e-07	12.9987
MUC1	1.65661	8.30619	11.5805	4.11059e-09	4.70473e-07	11.3037
GCA	1.01989	7.14387	11.5345	4.34929e-09	4.81605e-07	11.2478
MFGE8	-2.32691	9.42079	-11.3336	5.57688e-09	5.62645e-07	11.001
STOM	-2.22734	7.60715	-10.6974	1.2547e-08	8.37699e-07	10.1935
CDH1	2.54069	8.21891	10.2336	2.32087e-08	1.25937e-06	9.57844
RHOF	1.25092	7.50418	9.33537	8.12542e-08	3.04034e-06	8.31955
GPRC5A	1.28457	8.8682	9.01659	1.29442e-07	4.28461e-06	7.85003
S100A16	1.18701	8.95123	8.87984	1.58621e-07	5.00096e-06	7.64481
RPS23	1.2136	8.24857	8.8655	1.6206e-07	5.08584e-06	7.62315
ANXA5	-1.11286	10.7035	-8.52591	2.71182e-07	7.49189e-06	7.10275
LAMA5	1.33871	9.80813	8.2387	4.23694e-07	1.03233e-05	6.65107
SLC2A1	1.05749	8.68766	8.0752	5.4871e-07	1.26027e-05	6.38911
HSPB1	-1.50779	8.78225	-7.9889	6.29795e-07	1.39704e-05	6.2494
THY1	-1.24869	6.90339	-7.66456	1.06618e-06	2.11123e-05	5.71541
AKR1B1	-3.00419	8.78788	-7.52681	1.33883e-06	2.50823e-05	5.48428
ITGB4	1.46067	7.39306	7.3266	1.87235e-06	3.26105e-05	5.1437
SCPEP1	-1.49259	8.00174	-6.93515	3.66353e-06	5.32521e-05	4.46172
EZR	1.72512	10.8176	6.56498	7.0447e-06	8.81073e-05	3.79714
PODXL	1.43219	7.26499	6.52863	7.51947e-06	9.31894e-05	3.73085
MARCKS	-1.29556	9.44881	-6.04777	1.81255e-05	0.000189172	2.83674
TMC4	1.42686	7.4721	5.87931	2.48539e-05	0.000239569	2.51609
C5orf46	-1.10545	7.10472	-4.96896	0.000145954	0.000986059	0.722076
S100A4	2.47641	8.55782	4.88391	0.000173101	0.00113402	0.549754
PROM2	1.43742	7.09298	4.60134	0.000306794	0.00179645	-0.0273778
KRT13	3.28877	8.08638	4.35451	0.00050899	0.00269012	-0.536353
LCP1	1.92402	7.36307	4.23544	0.000650986	0.00328995	-0.783117
ARHGDIB	1.71305	9.39446	4.05311	0.000950677	0.00445875	-1.16197
THBS1	-1.07339	9.75845	-3.95484	0.00116688	0.00519884	-1.36646
PHGDH	-1.41761	10.7162	-3.93298	0.00122139	0.00538857	-1.41197
PFN2	-1.14144	7.72794	-3.64657	0.00222463	0.00874192	-2.00763
CXCL12	-1.56424	7.40689	-3.53384	0.00281798	0.0106377	-2.24136
WNT5A	-1.0393	7.12735	-3.50653	0.00298411	0.011172	-2.29788
SERINC2	1.11321	8.04922	3.44269	0.00341156	0.0124202	-2.42979
LDHB	-1.72344	8.02552	-3.0385	0.00793728	0.0245132	-3.25534
BASP1	-2.24302	8.80759	-2.83592	0.0120658	0.0344738	-3.65974
CCL2	-1.56262	7.63068	-2.78095	0.0135072	0.0378223	-3.768

## Sheet: Table S3 
ONTOLOGY	ID	Description	GeneRatio	BgRatio	pvalue	p.adjust	qvalue	geneID	Count
BP	GO:0040013	negative regulation of locomotion	8/41	423/18870	2.98122e-06	0.00449568	0.00298436	CDH1/THY1/ARHGDIB/THBS1/PFN2/CXCL12/WNT5A/CCL2	8
BP	GO:0002064	epithelial cell development	6/41	214/18870	6.40323e-06	0.00482803	0.00320498	VIM/SFN/AKR1B1/EZR/PODXL/WNT5A	6
BP	GO:0001667	ameboidal-type cell migration	8/41	497/18870	9.73249e-06	0.0048922	0.00324758	GLIPR2/LAMA5/HSPB1/ITGB4/ARHGDIB/THBS1/PFN2/WNT5A	8
BP	GO:0030336	negative regulation of cell migration	7/41	373/18870	1.40421e-05	0.00529388	0.00351422	CDH1/THY1/ARHGDIB/THBS1/PFN2/CXCL12/CCL2	7
BP	GO:2000146	negative regulation of cell motility	7/41	388/18870	1.81088e-05	0.00532359	0.00353395	CDH1/THY1/ARHGDIB/THBS1/PFN2/CXCL12/CCL2	7
BP	GO:0007350	blastoderm segmentation	3/41	25/18870	2.11814e-05	0.00532359	0.00353395	LAMA5/WNT5A/BASP1	3
BP	GO:0007162	negative regulation of cell adhesion	6/41	312/18870	5.37785e-05	0.00965418	0.00640872	EPCAM/MUC1/CDH1/PODXL/THBS1/CXCL12	6
BP	GO:0001822	kidney development	6/41	314/18870	5.57195e-05	0.00965418	0.00640872	EPCAM/LAMA5/AKR1B1/PODXL/WNT5A/BASP1	6
BP	GO:0031345	negative regulation of cell projection organization	5/41	192/18870	5.76178e-05	0.00965418	0.00640872	VIM/CDH1/THY1/PFN2/WNT5A	5
BP	GO:0072001	renal system development	6/41	324/18870	6.62843e-05	0.00999568	0.00663541	EPCAM/LAMA5/AKR1B1/PODXL/WNT5A/BASP1	6
BP	GO:0010737	protein kinase A signaling	3/41	38/18870	7.61803e-05	0.0104153	0.00691398	SFN/EZR/LCP1	3
BP	GO:0022407	regulation of cell-cell adhesion	7/41	493/18870	8.28805e-05	0.0104153	0.00691398	EPCAM/CDH1/THY1/PODXL/CXCL12/WNT5A/CCL2	7
BP	GO:0002685	regulation of leukocyte migration	5/41	230/18870	0.000134967	0.0132797	0.0088154	THY1/THBS1/CXCL12/WNT5A/CCL2	5
BP	GO:0050920	regulation of chemotaxis	5/41	232/18870	0.000140544	0.0132797	0.0088154	HSPB1/THBS1/CXCL12/WNT5A/CCL2	5
BP	GO:0071675	regulation of mononuclear cell migration	4/41	125/18870	0.000153719	0.0132797	0.0088154	THBS1/CXCL12/WNT5A/CCL2	4
BP	GO:0043277	apoptotic cell clearance	3/41	48/18870	0.000153852	0.0132797	0.0088154	MFGE8/THBS1/CCL2	3
BP	GO:0044331	cell-cell adhesion mediated by cadherin	3/41	48/18870	0.000153852	0.0132797	0.0088154	EPCAM/CDH1/WNT5A	3
BP	GO:0002688	regulation of leukocyte chemotaxis	4/41	126/18870	0.00015851	0.0132797	0.0088154	THBS1/CXCL12/WNT5A/CCL2	4
BP	GO:0015911	long-chain fatty acid import across plasma membrane	2/41	10/18870	0.000204997	0.0147207	0.00977202	SLC2A1/THBS1	2
BP	GO:0019852	L-ascorbic acid metabolic process	2/41	10/18870	0.000204997	0.0147207	0.00977202	SLC2A1/AKR1B1	2
BP	GO:1901334	lactone metabolic process	2/41	10/18870	0.000204997	0.0147207	0.00977202	SLC2A1/AKR1B1	2
BP	GO:0050678	regulation of epithelial cell proliferation	6/41	407/18870	0.000230283	0.0155721	0.0103372	SFN/LAMA5/THBS1/CXCL12/WNT5A/CCL2	6
BP	GO:0010977	negative regulation of neuron projection development	4/41	140/18870	0.000237506	0.0155721	0.0103372	VIM/CDH1/THY1/WNT5A	4
BP	GO:0050921	positive regulation of chemotaxis	4/41	145/18870	0.000271574	0.0170639	0.0113275	HSPB1/THBS1/CXCL12/WNT5A	4
BP	GO:0002687	positive regulation of leukocyte migration	4/41	149/18870	0.000301254	0.0179234	0.0118981	THY1/THBS1/CXCL12/WNT5A	4
BP	GO:0072073	kidney epithelium development	4/41	150/18870	0.000309024	0.0179234	0.0118981	EPCAM/LAMA5/PODXL/BASP1	4
BP	GO:0032530	regulation of microvillus organization	2/41	13/18870	0.000353862	0.0181519	0.0120498	EZR/PODXL	2
BP	GO:0051764	actin crosslink formation	2/41	13/18870	0.000353862	0.0181519	0.0120498	MARCKS/LCP1	2
BP	GO:0050770	regulation of axonogenesis	4/41	157/18870	0.000367499	0.0181519	0.0120498	CDH1/THY1/CXCL12/WNT5A	4
BP	GO:0050771	negative regulation of axonogenesis	3/41	66/18870	0.000396153	0.0181519	0.0120498	CDH1/THY1/WNT5A	3
BP	GO:0051017	actin filament bundle assembly	4/41	161/18870	0.000404261	0.0181519	0.0120498	EZR/MARCKS/LCP1/PFN2	4
BP	GO:0010632	regulation of epithelial cell migration	5/41	295/18870	0.000426595	0.0181519	0.0120498	GLIPR2/HSPB1/THBS1/PFN2/WNT5A	5
BP	GO:0061572	actin filament bundle organization	4/41	165/18870	0.000443583	0.0181519	0.0120498	EZR/MARCKS/LCP1/PFN2	4
BP	GO:0050918	positive chemotaxis	3/41	69/18870	0.00045154	0.0181519	0.0120498	S100A4/CXCL12/WNT5A	3
BP	GO:2000401	regulation of lymphocyte migration	3/41	69/18870	0.00045154	0.0181519	0.0120498	CXCL12/WNT5A/CCL2	3
BP	GO:0007015	actin filament organization	6/41	464/18870	0.000463678	0.0181519	0.0120498	RHOF/EZR/MARCKS/LCP1/PFN2/CXCL12	6
BP	GO:0050922	negative regulation of chemotaxis	3/41	70/18870	0.000471049	0.0181519	0.0120498	THBS1/WNT5A/CCL2	3
BP	GO:0090280	positive regulation of calcium ion import	2/41	15/18870	0.000475043	0.0181519	0.0120498	CXCL12/CCL2	2
BP	GO:0006935	chemotaxis	6/41	468/18870	0.000485208	0.0181519	0.0120498	HSPB1/S100A4/THBS1/CXCL12/WNT5A/CCL2	6
BP	GO:0042330	taxis	6/41	470/18870	0.000496262	0.0181519	0.0120498	HSPB1/S100A4/THBS1/CXCL12/WNT5A/CCL2	6
BP	GO:0050680	negative regulation of epithelial cell proliferation	4/41	173/18870	0.00053031	0.0181519	0.0120498	SFN/THBS1/WNT5A/CCL2	4
BP	GO:0072678	T cell migration	3/41	73/18870	0.000532797	0.0181519	0.0120498	CXCL12/WNT5A/CCL2	3
BP	GO:0030033	microvillus assembly	2/41	16/18870	0.00054216	0.0181519	0.0120498	EZR/PODXL	2
BP	GO:0009880	embryonic pattern specification	3/41	74/18870	0.000554474	0.0181519	0.0120498	LAMA5/WNT5A/BASP1	3
BP	GO:0045123	cellular extravasation	3/41	74/18870	0.000554474	0.0181519	0.0120498	THY1/CXCL12/CCL2	3
BP	GO:0050673	epithelial cell proliferation	6/41	480/18870	0.000554522	0.0181519	0.0120498	SFN/LAMA5/THBS1/CXCL12/WNT5A/CCL2	6
BP	GO:0010634	positive regulation of epithelial cell migration	4/41	176/18870	0.000565743	0.0181519	0.0120498	GLIPR2/HSPB1/THBS1/WNT5A	4
BP	GO:0006469	negative regulation of protein kinase activity	4/41	179/18870	0.00060283	0.0188839	0.0125357	SFN/GPRC5A/HSPB1/THY1	4
BP	GO:0044539	long-chain fatty acid import into cell	2/41	17/18870	0.000613603	0.0188839	0.0125357	SLC2A1/THBS1	2
BP	GO:0001936	regulation of endothelial cell proliferation	4/41	181/18870	0.000628495	0.0189554	0.0125831	THBS1/CXCL12/WNT5A/CCL2	4
BP	GO:0060326	cell chemotaxis	5/41	325/18870	0.000662188	0.019275	0.0127953	HSPB1/THBS1/CXCL12/WNT5A/CCL2	5
BP	GO:0060485	mesenchyme development	5/41	327/18870	0.000680778	0.019275	0.0127953	GLIPR2/LAMA5/S100A4/WNT5A/BASP1	5
BP	GO:0061450	trophoblast cell migration	2/41	18/18870	0.000689354	0.019275	0.0127953	ITGB4/ARHGDIB	2
BP	GO:0048638	regulation of developmental growth	5/41	328/18870	0.000690218	0.019275	0.0127953	CDH1/EZR/CXCL12/WNT5A/BASP1	5
BP	GO:0032386	regulation of intracellular transport	5/41	336/18870	0.000769323	0.0210934	0.0140024	SFN/STOM/CDH1/EZR/LCP1	5
BP	GO:0033673	negative regulation of kinase activity	4/41	193/18870	0.000799055	0.0211048	0.0140099	SFN/GPRC5A/HSPB1/THY1	4
BP	GO:0007351	tripartite regional subdivision	2/41	20/18870	0.000853708	0.0211048	0.0140099	WNT5A/BASP1	2
BP	GO:0008595	anterior/posterior axis specification, embryo	2/41	20/18870	0.000853708	0.0211048	0.0140099	WNT5A/BASP1	2
BP	GO:0071474	cellular hyperosmotic response	2/41	20/18870	0.000853708	0.0211048	0.0140099	SLC2A1/AKR1B1	2
BP	GO:0140354	lipid import into cell	2/41	20/18870	0.000853708	0.0211048	0.0140099	SLC2A1/THBS1	2
BP	GO:1902001	fatty acid transmembrane transport	2/41	20/18870	0.000853708	0.0211048	0.0140099	SLC2A1/THBS1	2
BP	GO:0033627	cell adhesion mediated by integrin	3/41	88/18870	0.000919065	0.0213098	0.0141461	MUC1/ITGB4/PODXL	3
BP	GO:0032388	positive regulation of intracellular transport	4/41	201/18870	0.000929493	0.0213098	0.0141461	SFN/STOM/CDH1/EZR	4
BP	GO:0061318	renal filtration cell differentiation	2/41	21/18870	0.000942275	0.0213098	0.0141461	PODXL/BASP1	2
BP	GO:0072112	podocyte differentiation	2/41	21/18870	0.000942275	0.0213098	0.0141461	PODXL/BASP1	2
BP	GO:2000047	regulation of cell-cell adhesion mediated by cadherin	2/41	21/18870	0.000942275	0.0213098	0.0141461	EPCAM/WNT5A	2
BP	GO:0001935	endothelial cell proliferation	4/41	202/18870	0.00094679	0.0213098	0.0141461	THBS1/CXCL12/WNT5A/CCL2	4
BP	GO:0022408	negative regulation of cell-cell adhesion	4/41	205/18870	0.00100004	0.0221774	0.014722	EPCAM/CDH1/PODXL/CXCL12	4
BP	GO:0072311	glomerular epithelial cell differentiation	2/41	22/18870	0.00103508	0.0222049	0.0147402	PODXL/BASP1	2
BP	GO:0071674	mononuclear cell migration	4/41	207/18870	0.0010367	0.0222049	0.0147402	THBS1/CXCL12/WNT5A/CCL2	4
BP	GO:0030516	regulation of axon extension	3/41	92/18870	0.00104546	0.0222049	0.0147402	CDH1/CXCL12/WNT5A	3
BP	GO:0007044	cell-substrate junction assembly	3/41	95/18870	0.00114712	0.023099	0.0153338	THY1/ITGB4/THBS1	3
BP	GO:0072091	regulation of stem cell proliferation	3/41	95/18870	0.00114712	0.023099	0.0153338	SFN/EPCAM/WNT5A	3
BP	GO:0002690	positive regulation of leukocyte chemotaxis	3/41	96/18870	0.00118235	0.023099	0.0153338	THBS1/CXCL12/WNT5A	3
BP	GO:0032535	regulation of cellular component size	5/41	370/18870	0.00118345	0.023099	0.0153338	CDH1/EZR/PFN2/CXCL12/WNT5A	5
BP	GO:0010631	epithelial cell migration	5/41	372/18870	0.00121211	0.023099	0.0153338	GLIPR2/HSPB1/THBS1/PFN2/WNT5A	5
BP	GO:0032528	microvillus organization	2/41	24/18870	0.00123332	0.023099	0.0153338	EZR/PODXL	2
BP	GO:0040037	negative regulation of fibroblast growth factor receptor signaling pathway	2/41	24/18870	0.00123332	0.023099	0.0153338	THBS1/WNT5A	2
BP	GO:2000353	positive regulation of endothelial cell apoptotic process	2/41	24/18870	0.00123332	0.023099	0.0153338	THBS1/CCL2	2
BP	GO:2001026	regulation of endothelial cell chemotaxis	2/41	24/18870	0.00123332	0.023099	0.0153338	HSPB1/THBS1	2
BP	GO:0001657	ureteric bud development	3/41	98/18870	0.00125483	0.023099	0.0153338	EPCAM/LAMA5/BASP1	3
BP	GO:0090132	epithelium migration	5/41	375/18870	0.00125605	0.023099	0.0153338	GLIPR2/HSPB1/THBS1/PFN2/WNT5A	5
BP	GO:0072163	mesonephric epithelium development	3/41	99/18870	0.0012921	0.0231963	0.0153984	EPCAM/LAMA5/BASP1	3
BP	GO:0072164	mesonephric tubule development	3/41	99/18870	0.0012921	0.0231963	0.0153984	EPCAM/LAMA5/BASP1	3
BP	GO:0090130	tissue migration	5/41	380/18870	0.0013319	0.0232045	0.0154038	GLIPR2/HSPB1/THBS1/PFN2/WNT5A	5
BP	GO:0050860	negative regulation of T cell receptor signaling pathway	2/41	25/18870	0.00133872	0.0232045	0.0154038	THY1/EZR	2
BP	GO:0072010	glomerular epithelium development	2/41	25/18870	0.00133872	0.0232045	0.0154038	PODXL/BASP1	2
BP	GO:0008630	intrinsic apoptotic signaling pathway in response to DNA damage	3/41	102/18870	0.00140808	0.0232343	0.0154236	SFN/MUC1/CXCL12	3
BP	GO:0150115	cell-substrate junction organization	3/41	102/18870	0.00140808	0.0232343	0.0154236	THY1/ITGB4/THBS1	3
BP	GO:0051348	negative regulation of transferase activity	4/41	225/18870	0.00141029	0.0232343	0.0154236	SFN/GPRC5A/HSPB1/THY1	4
BP	GO:0033157	regulation of intracellular protein transport	4/41	226/18870	0.00143346	0.0232343	0.0154236	SFN/STOM/CDH1/LCP1	4
BP	GO:0001823	mesonephros development	3/41	103/18870	0.00144814	0.0232343	0.0154236	EPCAM/LAMA5/BASP1	3
BP	GO:0035282	segmentation	3/41	103/18870	0.00144814	0.0232343	0.0154236	LAMA5/WNT5A/BASP1	3
BP	GO:1901623	regulation of lymphocyte chemotaxis	2/41	26/18870	0.00144829	0.0232343	0.0154236	WNT5A/CCL2	2
BP	GO:0006972	hyperosmotic response	2/41	27/18870	0.00156201	0.0244486	0.0162297	SLC2A1/AKR1B1	2
BP	GO:0099170	postsynaptic modulation of chemical synaptic transmission	2/41	27/18870	0.00156201	0.0244486	0.0162297	CDH1/WNT5A	2
BP	GO:0032760	positive regulation of tumor necrosis factor production	3/41	106/18870	0.00157262	0.0244486	0.0162297	HSPB1/THBS1/WNT5A	3
BP	GO:0050900	leukocyte migration	5/41	396/18870	0.00159755	0.0245827	0.0163187	THY1/THBS1/CXCL12/WNT5A/CCL2	5
BP	GO:2001233	regulation of apoptotic signaling pathway	5/41	398/18870	0.00163331	0.0248791	0.0165155	MUC1/HSPB1/THBS1/CXCL12/WNT5A	5
BP	GO:0061387	regulation of extent of cell growth	3/41	109/18870	0.00170362	0.0256906	0.0170541	CDH1/CXCL12/WNT5A	3
BP	GO:1903557	positive regulation of tumor necrosis factor superfamily cytokine production	3/41	110/18870	0.00174876	0.0261102	0.0173327	HSPB1/THBS1/WNT5A	3
BP	GO:0030595	leukocyte chemotaxis	4/41	240/18870	0.00178642	0.0262749	0.017442	THBS1/CXCL12/WNT5A/CCL2	4
BP	GO:0007229	integrin-mediated signaling pathway	3/41	111/18870	0.00179464	0.0262749	0.017442	LAMA5/THY1/ITGB4	3
BP	GO:2001234	negative regulation of apoptotic signaling pathway	4/41	243/18870	0.00186925	0.0271041	0.0179924	MUC1/HSPB1/THBS1/CXCL12	4
BP	GO:0043032	positive regulation of macrophage activation	2/41	30/18870	0.00192785	0.0272959	0.0181198	THBS1/WNT5A	2
BP	GO:1902230	negative regulation of intrinsic apoptotic signaling pathway in response to DNA damage	2/41	30/18870	0.00192785	0.0272959	0.0181198	MUC1/CXCL12	2
BP	GO:2001243	negative regulation of intrinsic apoptotic signaling pathway	3/41	114/18870	0.00193677	0.0272959	0.0181198	MUC1/HSPB1/CXCL12	3
BP	GO:0044344	cellular response to fibroblast growth factor stimulus	3/41	115/18870	0.00198567	0.0277258	0.0184052	THBS1/WNT5A/CCL2	3
BP	GO:0035767	endothelial cell chemotaxis	2/41	31/18870	0.00205798	0.0284719	0.0189004	HSPB1/THBS1	2
BP	GO:0051928	positive regulation of calcium ion transport	3/41	118/18870	0.00213696	0.0292957	0.0194473	THY1/CXCL12/CCL2	3
BP	GO:1901889	negative regulation of cell junction assembly	2/41	32/18870	0.00219217	0.0297819	0.01977	THBS1/WNT5A	2
BP	GO:0071346	cellular response to type II interferon	3/41	120/18870	0.00224169	0.029884	0.0198378	VIM/WNT5A/CCL2	3
BP	GO:0072009	nephron epithelium development	3/41	120/18870	0.00224169	0.029884	0.0198378	LAMA5/PODXL/BASP1	3
BP	GO:0045927	positive regulation of growth	4/41	256/18870	0.00225913	0.029884	0.0198378	SFN/EZR/CXCL12/BASP1	4
BP	GO:0048675	axon extension	3/41	121/18870	0.00229524	0.0300268	0.0199326	CDH1/CXCL12/WNT5A	3
BP	GO:0050858	negative regulation of antigen receptor-mediated signaling pathway	2/41	33/18870	0.00233039	0.0300268	0.0199326	THY1/EZR	2
BP	GO:0090279	regulation of calcium ion import	2/41	33/18870	0.00233039	0.0300268	0.0199326	CXCL12/CCL2	2
BP	GO:0021782	glial cell development	3/41	122/18870	0.00234957	0.0300268	0.0199326	VIM/ITGB4/PHGDH	3
BP	GO:0071774	response to fibroblast growth factor	3/41	123/18870	0.0024047	0.030473	0.0202288	THBS1/WNT5A/CCL2	3
BP	GO:0048762	mesenchymal cell differentiation	4/41	262/18870	0.00245673	0.0305635	0.0202889	GLIPR2/LAMA5/S100A4/WNT5A	4
BP	GO:0072676	lymphocyte migration	3/41	124/18870	0.00246063	0.0305635	0.0202889	CXCL12/WNT5A/CCL2	3
BP	GO:0048841	regulation of axon extension involved in axon guidance	2/41	34/18870	0.00247265	0.0305635	0.0202889	CXCL12/WNT5A	2
BP	GO:0072089	stem cell proliferation	3/41	125/18870	0.00251735	0.0308632	0.0204878	SFN/EPCAM/WNT5A	3
BP	GO:2000406	positive regulation of T cell migration	2/41	35/18870	0.0026189	0.0318493	0.0211424	CXCL12/WNT5A	2
BP	GO:0034329	cell junction assembly	5/41	446/18870	0.00268164	0.0322231	0.0213906	CDH1/THY1/ITGB4/THBS1/WNT5A	5
BP	GO:0098773	skin epidermis development	3/41	128/18870	0.00269238	0.0322231	0.0213906	SFN/LAMA5/WNT5A	3
BP	GO:0010595	positive regulation of endothelial cell migration	3/41	130/18870	0.00281315	0.0334034	0.0221741	HSPB1/THBS1/WNT5A	3
BP	GO:0010975	regulation of neuron projection development	5/41	453/18870	0.00286775	0.0337857	0.0224279	VIM/CDH1/THY1/CXCL12/WNT5A	5
BP	GO:0040036	regulation of fibroblast growth factor receptor signaling pathway	2/41	38/18870	0.00308155	0.0352044	0.0233697	THBS1/WNT5A	2
BP	GO:0048846	axon extension involved in axon guidance	2/41	38/18870	0.00308155	0.0352044	0.0233697	CXCL12/WNT5A	2
BP	GO:1902229	regulation of intrinsic apoptotic signaling pathway in response to DNA damage	2/41	38/18870	0.00308155	0.0352044	0.0233697	MUC1/CXCL12	2
BP	GO:1902284	neuron projection extension involved in neuron projection guidance	2/41	38/18870	0.00308155	0.0352044	0.0233697	CXCL12/WNT5A	2
BP	GO:1903829	positive regulation of protein localization	5/41	476/18870	0.00354563	0.0395131	0.0262299	SFN/STOM/CDH1/EZR/WNT5A	5
BP	GO:0002691	regulation of cellular extravasation	2/41	41/18870	0.00357965	0.0395131	0.0262299	THY1/CXCL12	2
BP	GO:0048246	macrophage chemotaxis	2/41	41/18870	0.00357965	0.0395131	0.0262299	THBS1/CCL2	2
BP	GO:0043086	negative regulation of catalytic activity	5/41	480/18870	0.00367438	0.0395131	0.0262299	SFN/GPRC5A/HSPB1/THY1/THBS1	5
BP	GO:0034341	response to type II interferon	3/41	143/18870	0.00367984	0.0395131	0.0262299	VIM/WNT5A/CCL2	3
BP	GO:0045785	positive regulation of cell adhesion	5/41	482/18870	0.00374001	0.0395131	0.0262299	THY1/PODXL/CXCL12/WNT5A/CCL2	5
BP	GO:0051592	response to calcium ion	3/41	144/18870	0.00375251	0.0395131	0.0262299	S100A16/THBS1/WNT5A	3
BP	GO:0000578	embryonic axis specification	2/41	42/18870	0.00375348	0.0395131	0.0262299	WNT5A/BASP1	2
BP	GO:0021983	pituitary gland development	2/41	42/18870	0.00375348	0.0395131	0.0262299	CDH1/WNT5A	2
BP	GO:0030866	cortical actin cytoskeleton organization	2/41	42/18870	0.00375348	0.0395131	0.0262299	EZR/LCP1	2
BP	GO:2000403	positive regulation of lymphocyte migration	2/41	42/18870	0.00375348	0.0395131	0.0262299	CXCL12/WNT5A	2
BP	GO:0050808	synapse organization	5/41	483/18870	0.00377313	0.0395131	0.0262299	CDH1/LAMA5/EZR/PFN2/WNT5A	5
BP	GO:1904037	positive regulation of epithelial cell apoptotic process	2/41	43/18870	0.00393118	0.0408843	0.0271401	THBS1/CCL2	2
BP	GO:0050768	negative regulation of neurogenesis	3/41	149/18870	0.00412902	0.0426476	0.0283107	CDH1/THY1/WNT5A	3
BP	GO:0001933	negative regulation of protein phosphorylation	4/41	304/18870	0.00418407	0.0429223	0.0284931	SFN/GPRC5A/HSPB1/THY1	4
BP	GO:0050856	regulation of T cell receptor signaling pathway	2/41	45/18870	0.00429813	0.0437944	0.029072	THY1/EZR	2
BP	GO:0030517	negative regulation of axon extension	2/41	46/18870	0.00448734	0.0454155	0.0301481	CDH1/WNT5A	2
BP	GO:0051961	negative regulation of nervous system development	3/41	155/18870	0.00461023	0.0463482	0.0307672	CDH1/THY1/WNT5A	3
BP	GO:0035850	epithelial cell differentiation involved in kidney development	2/41	47/18870	0.00468036	0.0465654	0.0309114	PODXL/BASP1	2
BP	GO:0072006	nephron development	3/41	156/18870	0.00469359	0.0465654	0.0309114	LAMA5/PODXL/BASP1	3
BP	GO:0043588	skin development	4/41	317/18870	0.00485181	0.0474501	0.0314987	SFN/LAMA5/ITGB4/WNT5A	4
BP	GO:0090316	positive regulation of intracellular protein transport	3/41	158/18870	0.00486305	0.0474501	0.0314987	SFN/STOM/CDH1	3
BP	GO:0070509	calcium ion import	2/41	48/18870	0.00487716	0.0474501	0.0314987	CXCL12/CCL2	2
BP	GO:0097193	intrinsic apoptotic signaling pathway	4/41	319/18870	0.00496054	0.0479519	0.0318318	SFN/MUC1/HSPB1/CXCL12	4
BP	GO:0033628	regulation of cell adhesion mediated by integrin	2/41	49/18870	0.00507774	0.0484635	0.0321714	MUC1/PODXL	2
BP	GO:2000404	regulation of T cell migration	2/41	49/18870	0.00507774	0.0484635	0.0321714	CXCL12/WNT5A	2
BP	GO:0022409	positive regulation of cell-cell adhesion	4/41	322/18870	0.0051267	0.048623	0.0322773	THY1/PODXL/WNT5A/CCL2	4
BP	GO:0021915	neural tube development	3/41	162/18870	0.00521301	0.0491326	0.0326156	MARCKS/PHGDH/WNT5A	3
BP	GO:0030865	cortical cytoskeleton organization	2/41	50/18870	0.00528207	0.0494743	0.0328424	EZR/LCP1	2
CC	GO:0045121	membrane raft	8/42	286/19886	1.28204e-07	1.04684e-05	6.86113e-06	STOM/CDH1/SLC2A1/THY1/EZR/PODXL/PROM2/LDHB	8
CC	GO:0098857	membrane microdomain	8/42	287/19886	1.31678e-07	1.04684e-05	6.86113e-06	STOM/CDH1/SLC2A1/THY1/EZR/PODXL/PROM2/LDHB	8
CC	GO:0005925	focal adhesion	8/42	421/19886	2.37182e-06	8.97577e-05	5.88283e-05	VIM/ANXA5/HSPB1/THY1/ITGB4/EZR/MARCKS/LCP1	8
CC	GO:0062023	collagen-containing extracellular matrix	8/42	429/19886	2.72701e-06	8.97577e-05	5.88283e-05	MFGE8/ANXA5/LAMA5/ITGB4/S100A4/THBS1/CXCL12/WNT5A	8
CC	GO:0030055	cell-substrate junction	8/42	431/19886	2.82257e-06	8.97577e-05	5.88283e-05	VIM/ANXA5/HSPB1/THY1/ITGB4/EZR/MARCKS/LCP1	8
CC	GO:0016324	apical plasma membrane	7/42	403/19886	1.94927e-05	0.000516558	0.000338558	EPCAM/MUC1/SLC2A1/THY1/EZR/PODXL/PROM2	7
CC	GO:0031252	cell leading edge	7/42	423/19886	2.65895e-05	0.000603961	0.000395844	VIM/CDH1/THY1/ITGB4/EZR/PODXL/LCP1	7
CC	GO:0031528	microvillus membrane	3/42	33/19886	4.57326e-05	0.000905276	0.000593329	EZR/PODXL/PROM2	3
CC	GO:0045177	apical part of cell	7/42	469/19886	5.1242e-05	0.000905276	0.000593329	EPCAM/MUC1/SLC2A1/THY1/EZR/PODXL/PROM2	7
CC	GO:0009897	external side of plasma membrane	6/42	387/19886	0.000151597	0.0024104	0.0015798	ANPEP/MFGE8/ANXA5/THY1/THBS1/CXCL12	6
CC	GO:0009925	basal plasma membrane	5/42	282/19886	0.000306457	0.00442969	0.00290327	EPCAM/SLC2A1/ITGB4/EZR/PROM2	5
CC	GO:0045178	basal part of cell	5/42	301/19886	0.000413187	0.00547473	0.0035882	EPCAM/SLC2A1/ITGB4/EZR/PROM2	5
CC	GO:0001674	female germ cell nucleus	2/42	17/19886	0.00058045	0.00709935	0.004653	SLC2A1/MARCKS	2
CC	GO:0031253	cell projection membrane	5/42	352/19886	0.000839096	0.00952974	0.00624591	THY1/EZR/PODXL/PROM2/LCP1	5
CC	GO:0005902	microvillus	3/42	97/19886	0.00112512	0.0119262	0.00781661	EZR/PODXL/PROM2	3
CC	GO:0098858	actin-based cell projection	4/42	227/19886	0.00131721	0.0130898	0.00857923	EZR/PODXL/PROM2/LCP1	4
CC	GO:0030863	cortical cytoskeleton	3/42	105/19886	0.00141386	0.0132237	0.00866701	CDH1/SLC2A1/EZR	3
CC	GO:0030175	filopodium	3/42	108/19886	0.00153304	0.0135419	0.0088755	EZR/PODXL/LCP1	3
CC	GO:0044853	plasma membrane raft	3/42	112/19886	0.0017015	0.0142389	0.00933235	CDH1/SLC2A1/EZR	3
CC	GO:0016323	basolateral plasma membrane	4/42	249/19886	0.0018486	0.0146963	0.00963216	EPCAM/SLC2A1/EZR/PROM2	4
CC	GO:0072562	blood microparticle	3/42	144/19886	0.00347202	0.0262882	0.0172296	STOM/ANXA5/SLC2A1	3
CC	GO:0005938	cell cortex	4/42	305/19886	0.00383914	0.0277465	0.0181854	CDH1/SLC2A1/EZR/MARCKS	4
CC	GO:0030667	secretory granule membrane	4/42	314/19886	0.00425665	0.0294264	0.0192864	ANPEP/MFGE8/STOM/RHOF	4
CC	GO:0031256	leading edge membrane	3/42	179/19886	0.00636331	0.0421569	0.0276302	THY1/EZR/LCP1	3
CC	GO:0001726	ruffle	3/42	182/19886	0.00666135	0.0423662	0.0277673	EZR/PODXL/LCP1	3
MF	GO:0005178	integrin binding	7/41	154/18496	4.28925e-08	6.51966e-06	4.515e-06	MFGE8/LAMA5/THY1/ITGB4/LCP1/THBS1/CXCL12	7
MF	GO:0001786	phosphatidylserine binding	3/41	62/18496	0.000349154	0.0258533	0.017904	MFGE8/ANXA5/THBS1	3
MF	GO:0005543	phospholipid binding	6/41	484/18496	0.000643178	0.0258533	0.017904	MFGE8/ANXA5/THY1/THBS1/PFN2/WNT5A	6
MF	GO:0045296	cadherin binding	5/41	334/18496	0.000819078	0.0258533	0.017904	SFN/EPCAM/CDH1/GPRC5A/EZR	5
MF	GO:0072341	modified amino acid binding	3/41	84/18496	0.000850438	0.0258533	0.017904	MFGE8/ANXA5/THBS1	3

## Sheet: Table S4 
ID	Description	setSize	enrichmentScore	NES	pvalue	p.adjust	qvalue	rank	leading_edge	core_enrichment
hsa04820	Cytoskeleton in muscle cells	153	-0.594866	-1.96755	3.36564e-08	1.14768e-05	1.04158e-05	898	tags=27%, list=8%, signal=25%	CSRP2/SNTA1/PKP2/SNTB2/ITGAV/ENO2/SGCE/COL4A3/COL6A2/FN1/ANKRD1/COL6A1/FBN1/NID2/LAMA2/FBLN2/CAPZA2/FLNC/COL4A2/DAAM2/FBN2/TLN1/TPM1/THBS1/NID1/DCN/ITGA1/COL6A3/THBS2/TPM2/MYL9/COL5A1/ITGA5/MYH10/COL3A1/VCAN/COL1A1/COL1A2/COL4A1/COL5A2/VIM
hsa04974	Protein digestion and absorption	55	-0.63929	-1.82701	0.000264852	0.0364753	0.0331031	674	tags=33%, list=6%, signal=31%	COL7A1/SLC38A2/DPP4/COL12A1/COL4A3/COL6A2/SLC1A1/COL6A1/COL4A2/PRCP/COL6A3/COL8A1/COL5A1/COL3A1/COL1A1/COL1A2/COL4A1/COL5A2
hsa04061	Viral protein interaction with cytokine and cytokine receptor	54	-0.635578	-1.79888	0.000534828	0.0364753	0.0331031	1342	tags=31%, list=12%, signal=28%	IL10RB/TNFRSF1A/CXCL14/CCL13/CXCL1/CSF1/TNFRSF1B/IL18R1/CXCR4/PPBP/IL6ST/CCL8/CXCL5/CXCL6/IL6/CCL2/CXCL12
hsa04915	Estrogen signaling pathway	98	0.537427	1.71039	0.000429692	0.0364753	0.0331031	744	tags=16%, list=7%, signal=15%	KRT13/KRT19/TGFA/KRT17/HBEGF/TFF1/KRT20/ITPR3/KRT15/KRT16/HSP90AB1/HSPA1B/MAP2K1/KRAS/FKBP4/RARA
hsa03040	Spliceosome	109	0.509618	1.64595	0.000501112	0.0364753	0.0331031	2552	tags=45%, list=23%, signal=35%	HSPA1B/SNRPA1/DHX15/SF3A1/SF3B4/PRPF3/EIF4A3/PHF5A/SMNDC1/HNRNPC/PRPF19/WBP11/LSM2/CWC15/PUF60/SF3A2/MAGOH/SNRPF/DDX42/DDX23/SYF2/DHX8/CHERP/DDX5/SF3B2/EFTUD2/SNRPB/U2AF2/PPIL1/NCBP2/HSPA8/HNRNPM/RBM25/SF3B1/RBM22/TCERG1/SNRPD3/SNRPD1/HSPA1A/SNW1/PRPF38A/DHX16/PRPF38B/DHX38/FUS/HNRNPA1/SNRPA/LSM7/RNU6-1

## Sheet: Table S5 
id	GSE144521_GSM4290033_Control	GSE144521_GSM4290034_Control	GSE144521_GSM4290035_Control	GSE144521_GSM4290036_Treat	GSE144521_GSM4290037_Treat	GSE144521_GSM4290038_Treat	GSE144521_GSM4290039_Treat	GSE144521_GSM4290040_Treat	GSE144521_GSM4290041_Treat	GSE77984_GSM2064129_Control	GSE77984_GSM2064130_Control	GSE77984_GSM2064131_Control	GSE77984_GSM2064132_Control	GSE77984_GSM2064141_Treat	GSE77984_GSM2064142_Treat	GSE77984_GSM2064143_Treat
Immature B cell	0.432846	0.436557	0.396262	0.523128	0.526366	0.527004	0.462646	0.386668	0.420294	0.437715	0.459506	0.444282	0.425441	0.497006	0.472276	0.449388
Plasmacytoid dendritic cell	0.903667	0.906979	0.906836	0.914727	0.907158	0.91387	0.86028	0.889266	0.899956	0.934323	0.927282	0.930033	0.923059	0.842459	0.843969	0.845115
MDSC	0.515328	0.490829	0.503402	0.404761	0.390988	0.403806	0.382724	0.405464	0.456734	0.497978	0.479004	0.497636	0.486147	0.400244	0.402099	0.397144
Neutrophil	0.33337	0.33719	0.31165	0.372032	0.374026	0.391165	0.457542	0.45862	0.448317	0.370167	0.397688	0.378257	0.377535	0.409367	0.389765	0.403291
T follicular helper cell	0.620937	0.620524	0.629789	0.593829	0.586296	0.588112	0.557227	0.556739	0.606573	0.595773	0.583964	0.576629	0.559925	0.593478	0.604433	0.597081
Central memory CD4 T cell	0.883039	0.896665	0.907031	0.883457	0.886639	0.877206	0.865141	0.894326	0.901363	0.930815	0.919489	0.912801	0.924446	0.842741	0.851495	0.845042
Macrophage	0.557745	0.567368	0.593518	0.471768	0.454282	0.494566	0.508285	0.514611	0.495756	0.624629	0.633483	0.612392	0.616767	0.390469	0.389387	0.381914
Immature dendritic cell	0.757843	0.755448	0.751672	0.837331	0.828623	0.823134	0.775004	0.814477	0.81354	0.753573	0.734558	0.772389	0.762461	0.820536	0.829229	0.837858
Type 2 T helper cell	0.57772	0.542977	0.52775	0.477494	0.519698	0.485051	0.52008	0.49697	0.49174	0.532678	0.504427	0.528568	0.501188	0.547608	0.550018	0.540593
Effector memeory CD8 T cell	0.569143	0.549589	0.53005	0.628422	0.631481	0.634792	0.59654	0.586353	0.599149	0.639609	0.642465	0.654126	0.650511	0.532819	0.531047	0.524751
Monocyte	0.950477	0.939807	0.964928	0.935303	0.912212	0.936721	0.948797	0.939596	0.940854	1	0.984095	0.980399	0.977277	0.917472	0.90458	0.91367
CD56dim natural killer cell	0.608071	0.607504	0.616833	0.655112	0.655002	0.645733	0.693447	0.701107	0.712902	0.657867	0.650114	0.662071	0.682591	0.650902	0.647412	0.651776
Mast cell	0.368836	0.36378	0.313129	0.529466	0.552826	0.524118	0.517295	0.577211	0.566753	0.486594	0.488022	0.502155	0.492437	0.417221	0.438599	0.456476
Natural killer T cell	0.589697	0.613197	0.617313	0.596836	0.60505	0.596622	0.458899	0.487682	0.488827	0.552018	0.558024	0.561089	0.544996	0.597957	0.596201	0.598878
Natural killer cell	0.55155	0.564475	0.572903	0.552919	0.544774	0.571999	0.531585	0.506836	0.509365	0.594485	0.586176	0.609591	0.602959	0.467885	0.485103	0.482426
Activated B cell	0.0901056	0.0880266	0.0921439	0.106982	0.0919098	0.0935512	0.0533448	0	0.0540123	0.136415	0.122247	0.132553	0.0894961	0.014747	0.0548103	0.043465
Eosinophil	0.395126	0.293045	0.322696	0.339422	0.366486	0.321577	0.39752	0.446913	0.377876	0.283149	0.285618	0.279193	0.261042	0.456703	0.456799	0.453351
Effector memeory CD4 T cell	0.6512	0.6418	0.635974	0.583898	0.592247	0.571515	0.612407	0.621386	0.613439	0.636555	0.628287	0.653522	0.626659	0.583812	0.592319	0.585688
Regulatory T cell	0.622578	0.617074	0.61615	0.601124	0.595599	0.601531	0.624553	0.617686	0.636185	0.662599	0.651513	0.682159	0.669876	0.588624	0.581473	0.567905
Central memory CD8 T cell	0.632479	0.656359	0.647088	0.673077	0.687991	0.701513	0.662115	0.693344	0.665102	0.646921	0.666263	0.669689	0.656827	0.714817	0.69993	0.706847
Activated CD8 T cell	0.727393	0.721162	0.716361	0.728109	0.737636	0.715563	0.742382	0.747272	0.748816	0.752309	0.755572	0.740405	0.716991	0.715695	0.703259	0.709972
Type 1 T helper cell	0.605085	0.630556	0.624551	0.656958	0.648442	0.656711	0.627489	0.622412	0.638281	0.642271	0.635557	0.641159	0.648712	0.608799	0.604932	0.609435
Type 17 T helper cell	0.263626	0.230622	0.248552	0.343131	0.330732	0.37675	0.307791	0.378983	0.360868	0.307583	0.328386	0.320099	0.324226	0.324335	0.294332	0.301042
Gamma delta T cell	0.680839	0.710042	0.709092	0.670742	0.69152	0.675739	0.67189	0.656555	0.65793	0.711796	0.725657	0.733135	0.712616	0.635522	0.645758	0.641272
Memory B cell	0.56378	0.597877	0.550658	0.573239	0.579303	0.586185	0.482351	0.522439	0.534141	0.510849	0.511695	0.515393	0.518283	0.600313	0.610029	0.613846
Activated dendritic cell	0.690196	0.702703	0.69322	0.717336	0.720258	0.739942	0.694268	0.69518	0.697847	0.725978	0.71907	0.734651	0.717795	0.720449	0.708141	0.71039
CD56bright natural killer cell	0.606785	0.606003	0.606146	0.721728	0.717596	0.722272	0.744446	0.724031	0.728218	0.636129	0.631059	0.626703	0.619366	0.760769	0.75672	0.747066
Activated CD4 T cell	0.745933	0.724233	0.686328	0.611891	0.664552	0.635654	0.55292	0.575346	0.608782	0.590261	0.568338	0.573392	0.584913	0.702536	0.705327	0.711732

## Sheet: Table S6 
Function	FDR	Genes in network	Genes in genome
G protein-coupled receptor binding	4.054563620045504e-15	12	198
non-canonical Wnt signaling pathway	6.160901900646234e-13	10	137
regulation of establishment of planar polarity	1.5920119785993253e-12	9	94
establishment of planar polarity	1.7026158650718832e-12	9	99
establishment of tissue polarity	1.7026158650718832e-12	9	100
morphogenesis of a polarized epithelium	4.7975265814508424e-12	9	114
regulation of animal organ morphogenesis	1.1163161973506532e-11	9	127
response to retinoic acid	3.3087724022085693e-11	7	42
sensory organ development	2.2477112700397492e-7	8	249
canonical Wnt signaling pathway	3.2224778179639696e-7	8	264
clathrin-coated endocytic vesicle	6.286266966317596e-7	5	37
midbrain dopaminergic neuron differentiation	7.706105205435688e-7	4	12
dopaminergic neuron differentiation	0.00000437914355879897	4	18
camera-type eye development	0.000007412655527265486	6	138
clathrin-coated vesicle membrane	0.00000857119927063601	5	65
eye development	0.000015188079552876962	6	159
endocytic vesicle membrane	0.00002320615664869312	5	81
visual system development	0.00004567084370257648	6	195
sensory system development	0.000047380706453113446	6	198
clathrin-coated vesicle	0.0001972861546303268	5	128
camera-type eye morphogenesis	0.00031695556207407506	4	56
midbrain development	0.00040057160037499306	4	60
coated vesicle membrane	0.00047390903155889065	5	157
eye morphogenesis	0.00085808104611211	4	74
central nervous system neuron differentiation	0.0014386054238802388	4	85
endocytic vesicle	0.0018014231796906323	5	211
pattern specification process	0.0022746465755239067	5	223
protein tyrosine kinase activity	0.0026643136050320177	4	102
positive regulation of cell projection organization	0.0027935673939660705	5	236
brain development	0.0029913640395558775	5	241
coated vesicle	0.003263601876177466	5	247
sensory organ morphogenesis	0.003383712299945384	4	112
embryonic morphogenesis	0.007378395905104401	5	296
regionalization	0.012107679725385298	4	157
morphogenesis of embryonic epithelium	0.01406943124055589	3	54
chordate embryonic development	0.019120844619482175	4	179
embryo development ending in birth or egg hatching	0.01985283477984138	4	182
embryonic camera-type eye morphogenesis	0.025115029068526085	2	10
skeletal system development	0.02704709243054439	4	201
stem cell proliferation	0.02704709243054439	3	70
cartilage development	0.027354811144546926	3	71
transmembrane receptor protein kinase activity	0.04257637262073191	3	83
regulation of phosphatidylinositol 3-kinase signaling	0.04277764062106064	3	84
embryonic eye morphogenesis	0.04277764062106064	2	14
embryonic camera-type eye development	0.04277764062106064	2	14
synapse organization	0.04676092843883262	4	240
Wnt signaling pathway, planar cell polarity pathway	0.04722807184226325	2	15
regulation of neuron projection development	0.06099213839065023	4	260
roof of mouth development	0.06588198432276823	2	18
phosphatidylinositol 3-kinase signaling	0.06987034791041614	3	104
neuron projection arborization	0.0867127766475288	2	21
connective tissue development	0.0951179826351476	3	117

## Sheet: Table S7 
Function	FDR	Genes in network	Genes in genome
regulation of actin filament organization	8.224578738453435e-15	12	219
regulation of actin filament length	8.224578738453435e-15	11	146
protein polymerization	1.4923447905569212e-14	12	241
regulation of actin cytoskeleton organization	1.586046750533424e-14	12	248
actin polymerization or depolymerization	2.092658234825917e-14	11	172
regulation of protein polymerization	3.094051490967627e-14	11	181
regulation of supramolecular fiber organization	7.758019246920231e-14	12	296
actin filament polymerization	9.717668341653603e-14	10	131
regulation of actin polymerization or depolymerization	1.978171355566316e-13	10	142
positive regulation of supramolecular fiber organization	1.1208265325216553e-12	10	170
positive regulation of protein polymerization	1.452314271326256e-12	9	108
regulation of cellular component size	1.452314271326256e-12	11	271
positive regulation of cytoskeleton organization	1.9286239937946754e-12	10	184
regulation of actin filament polymerization	2.229427386575187e-12	9	115
positive regulation of protein-containing complex assembly	1.0927186858284739e-10	9	177
actin binding	0.000001063244500034873	7	195
regulation of actin filament bundle assembly	0.000024696291419582525	5	82
actin nucleation	0.00006737177621698158	4	37
actin filament bundle assembly	0.00008074390877998613	5	106
positive regulation of actin filament polymerization	0.00014888811585224047	4	46
actin filament bundle organization	0.00023613843384339377	5	134
regulation of Arp2/3 complex-mediated actin nucleation	0.0002654425721477091	3	13
Arp2/3 complex-mediated actin nucleation	0.0004961286667048717	3	16
regulation of stress fiber assembly	0.000540458410040318	4	66
stress fiber assembly	0.0007578643525923141	4	73
regulation of ruffle assembly	0.0007578643525923141	3	19
immune response-regulating cell surface receptor signaling pathway involved in phagocytosis	0.0008189645364053481	4	76
Fc-gamma receptor signaling pathway	0.0008189645364053481	4	76
regulation of actin nucleation	0.0009093550629654727	3	21
regulation of actomyosin structure organization	0.0009093550629654727	4	80
Fc receptor mediated stimulatory signaling pathway	0.0009093550629654727	4	80
contractile actin filament bundle assembly	0.0012338346517308005	4	87
ruffle assembly	0.0012429371937746456	3	24
cortical cytoskeleton organization	0.001739828847210606	3	27
ruffle organization	0.0023411246402946103	3	30
cell leading edge	0.003409351098101042	5	257
Rho GTPase binding	0.003481177707478357	4	117
positive regulation of actin filament bundle assembly	0.0069668242735989126	3	44
actomyosin structure organization	0.0073076401351925184	4	143
negative regulation of protein polymerization	0.013012067508420188	3	55
Fc receptor signaling pathway	0.014038236156863585	4	171
regulation of cell projection assembly	0.014984078411513961	4	176
regulation of plasma membrane bounded cell projection assembly	0.014984078411513961	4	176
lamellipodium organization	0.02239648641800139	3	68
phagocytosis	0.02357973511161194	4	200
negative regulation of protein-containing complex assembly	0.0310766544033129	3	77
phosphatidylinositol bisphosphate binding	0.06233739496476508	3	98
actin cytoskeleton	0.06754360107127187	4	267
negative regulation of organelle organization	0.07205193504679505	4	273
negative regulation of supramolecular fiber organization	0.09645227551433289	3	116

## Sheet: Table S8 
sample	group	High Postive%	Mid Postive%	Low Postive%	Postive（High+Mid+Low）%	Negative%	H-Score	Mean OD
1	tumor	0	1.2116	17.1842	18.3958	81.6042	19.6074	0.364
2	tumor	0.01333	3.4477	11.5697	15.0307	84.9693	18.5051	0.338
3	tumor	0	0.2623	15.0431	15.3054	84.6946	15.5677	0.331
1	normal	0.7328	6.8932	29.2873	36.9133	63.0867	45.2721	0.391
2	normal	2.15	4.375	22.65	29.175	70.825	26.8252	0.385
3	normal	0.2693	8.572	15.0317	23.873	76.127	32.9836	0.417

## Sheet: Table S9 
sample	group	High Postive%	Postive%	Low Postive%	Postive（High+Mid+Low）%	Negative%	H-Score	Mean OD
1	tumor	0	5.274	15.436	20.71	79.29	25.984	0.35
2	tumor	0.001795	4.3449	17.392	21.7387	78.2613	26.0872	0.306
3	tumor	0.02987	2.7879	15.8485	18.6663	81.3337	21.5139	0.293
1	normal	0.99639	20.4458	15.3293	36.7715	63.2285	59.2101	0.427
2	normal	2.8988	18.7895	19.1247	40.813	59.187	65.4001	0.384
3	normal	1.1107	16.7736	18.0934	35.9777	64.0223	54.9727	0.352
